# Supplementary material for: Effect of Carbon Sources in Carotenoid Production from Haloarcula sp. M1, Halolamina sp. M3 and Halorubrum sp. M5, Halophilic Archaea Isolated from Sonora Saltern, Mexico
Source: MDPI journal article supplement (doi:10.3390/microorganisms9051096), 2021-05-20

S1. Detailed statistical analysis of carotenoid effect on pigment production at 120 h of culture.

*Haloarcula* sp. M1

BIOMASS

### Analysis of Variance

| Source        | DF | Adj SS   | Adj MS   | F-Value | P-Value |
|---------------|----|----------|----------|---------|---------|
| Carbon source | 4  | 0.008116 | 0.002029 | 13.32   | 0.001   |
| Error         | 10 | 0.001523 | 0.000152 |         |         |
| Total         | 14 | 0.009639 |          |         |         |

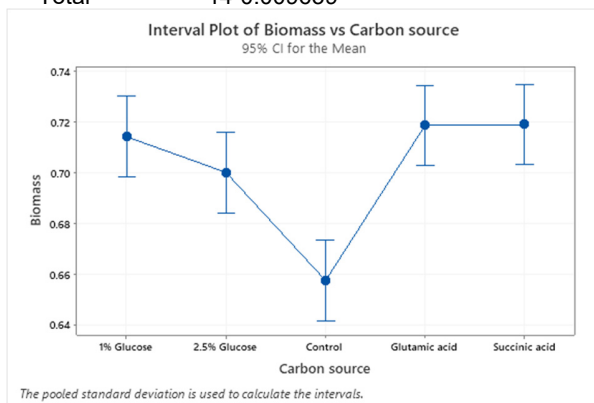

CAROTENOIDS

### Analysis of Variance

| Source        | DF | Adj SS  | Adj MS  | F-Value | P-Value   |
|---------------|----|---------|---------|---------|-----------|
| Carbon source | 4  | 218.615 | 54.6537 | 66.35   | 0.0000004 |
| Error         | 10 | 8.237   | 0.8237  |         |           |
| Total         | 14 | 226.852 |         |         |           |

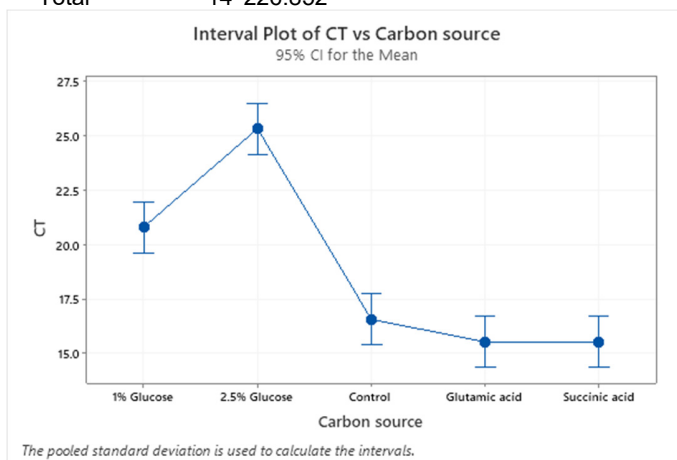

Halolamina sp. M3

## BIOMASS

### Analysis of Variance

| Source        | DF | Adj SS   | Adj MS   | F-Value | P-Value |
|---------------|----|----------|----------|---------|---------|
| Carbon source | 4  | 0.002465 | 0.000616 | 1.34    | 0.322   |
| Error         | 10 | 0.004614 | 0.000461 |         |         |
| Total         | 14 | 0.007078 |          |         |         |

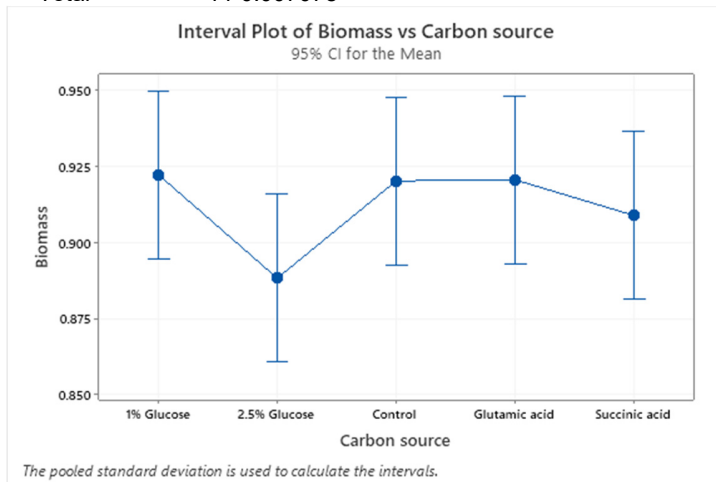

## CAROTENOIDS

### Analysis of Variance

| Source        | DF | Adj SS  | Adj MS  | F-Value | P-Value    |
|---------------|----|---------|---------|---------|------------|
| Carbon source | 4  | 14.3318 | 3.58296 | 115.15  | 0.00000003 |
| Error         | 10 | 0.3111  | 0.03111 |         |            |
| Total         | 14 | 14.6430 |         |         |            |

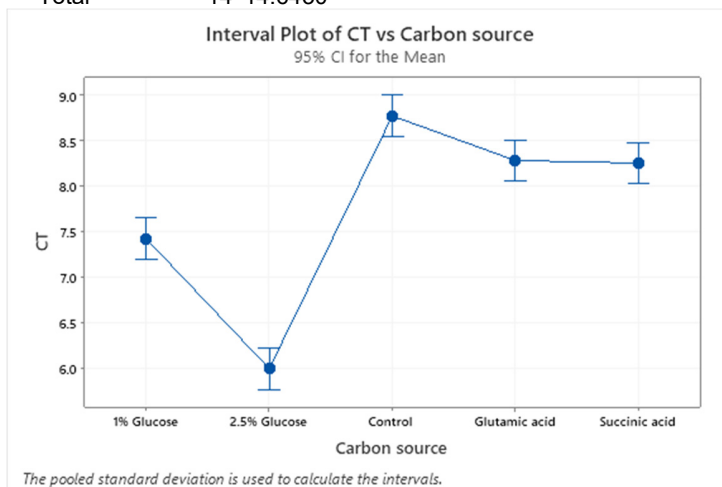

*Halorubrum* sp. M5

BIOMASS

### Analysis of Variance

| Source        | DF | Adj SS   | Adj MS   | F-Value | P-Value        |
|---------------|----|----------|----------|---------|----------------|
| Carbon source | 4  | 0.183412 | 0.045853 | 691.68  | 0.000000000004 |
| Error         | 10 | 0.000663 | 0.000066 |         |                |
| Total         | 14 | 0.184075 |          |         |                |

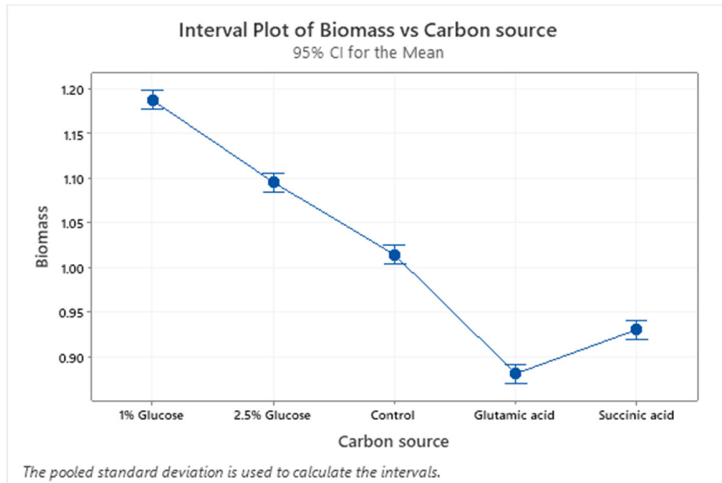

CAROTENOIDS

### Analysis of Variance

| Source        | DF | Adj SS  | Adj MS  | F-Value | P-Value    |
|---------------|----|---------|---------|---------|------------|
| Carbon source | 4  | 142.051 | 35.5127 | 121.31  | 0.00000002 |
| Error         | 10 | 2.928   | 0.2928  |         |            |
| Total         | 14 | 144.978 |         |         |            |

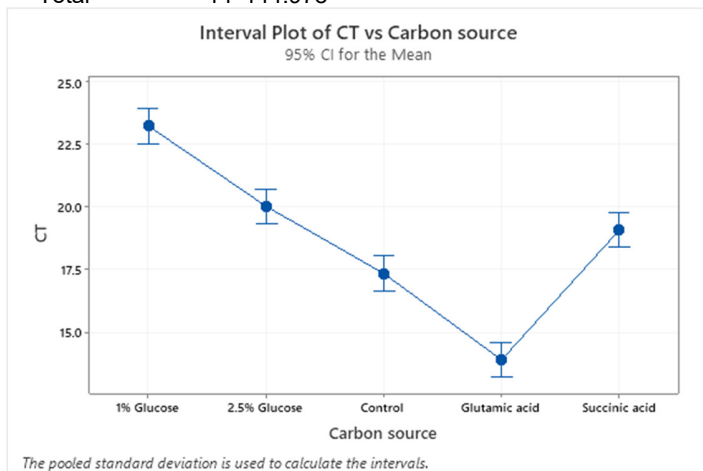

Supplement: s1 [file s1]
